# Supplementary material
Source: publisher figshare collection journal article supplement (https://acs.figshare.com/ndownloader/files/25756111)
Supplement: Supplementary file 1 [file 25756111]

## **Direct Measurement of the Shear Strength of Fly Ash Powder Beds**

**Nanami Aoki,<sup>1, 2</sup> Yohei Okada,<sup>\*, 1</sup> and Hidehiro Kamiya<sup>1</sup>**

<sup>1</sup>Department of Chemical Engineering, Tokyo University of Agriculture and Technology, 2-24-16 Naka-cho, Koganei, Tokyo 184-8588, Japan

<sup>2</sup>Technology Department, Energy & Environmental Group, Sumitomo Heavy Industries, Ltd., 25-9-7 Nishigotanda, Shinagawa, Tokyo 141-0031, Japan

Tel: (+81)-42-388-7068

Fax: (+81)-42-388-7068

E-mail: yokada@cc.tuat.ac.jp

### Table of Contents

1. Additional Figures     p. S2

2. Experimental Details for Measurements of Shear Strengths     p. S11

## 1. Additional Figures.

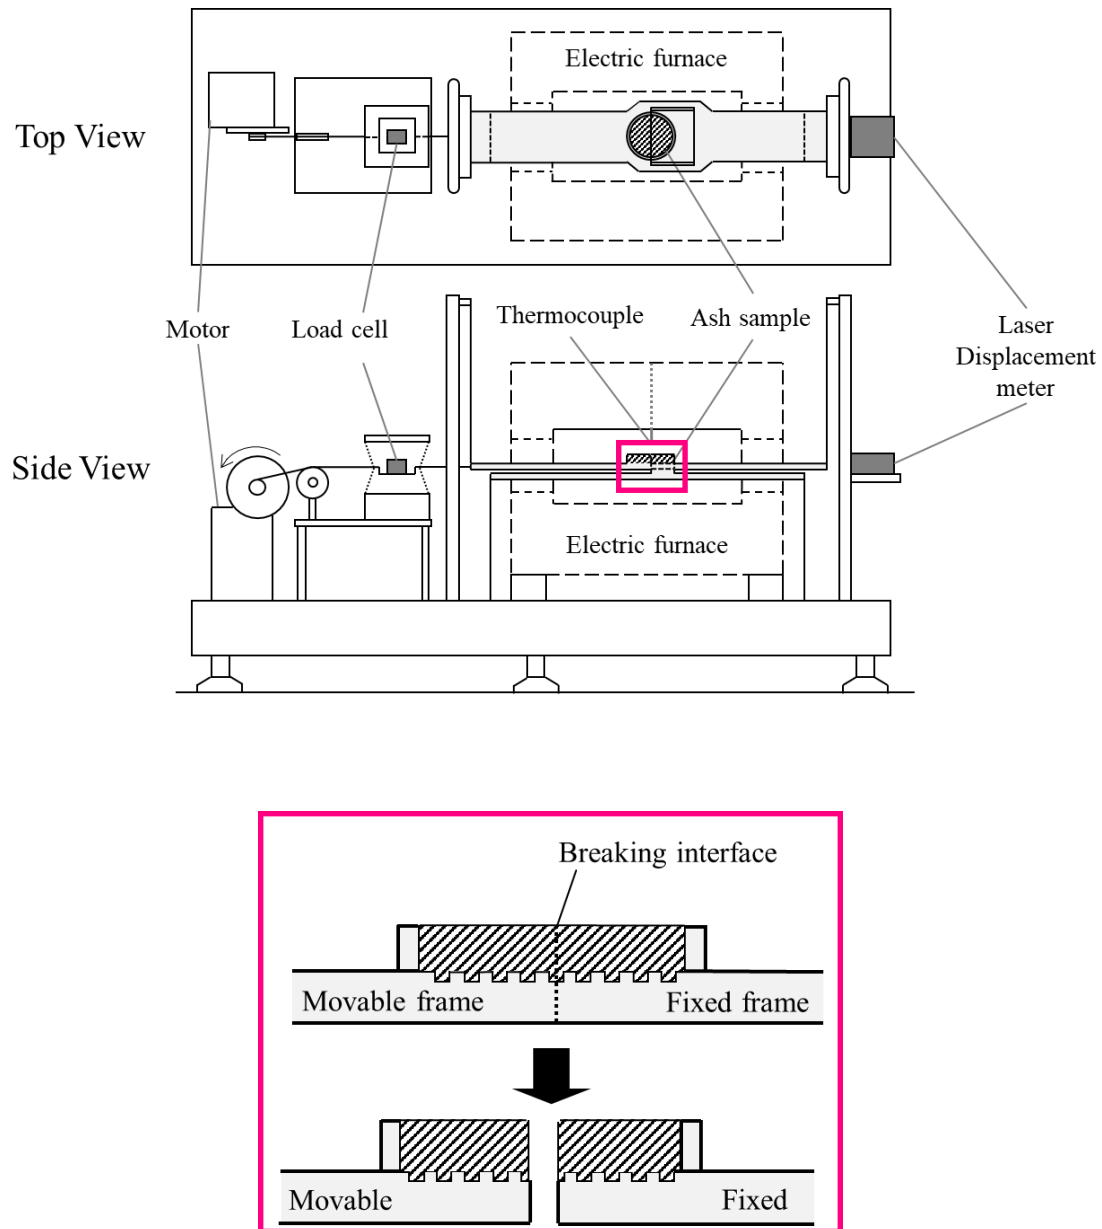

**Figure S1.** Schematic illustration of the tensile strength testing system.

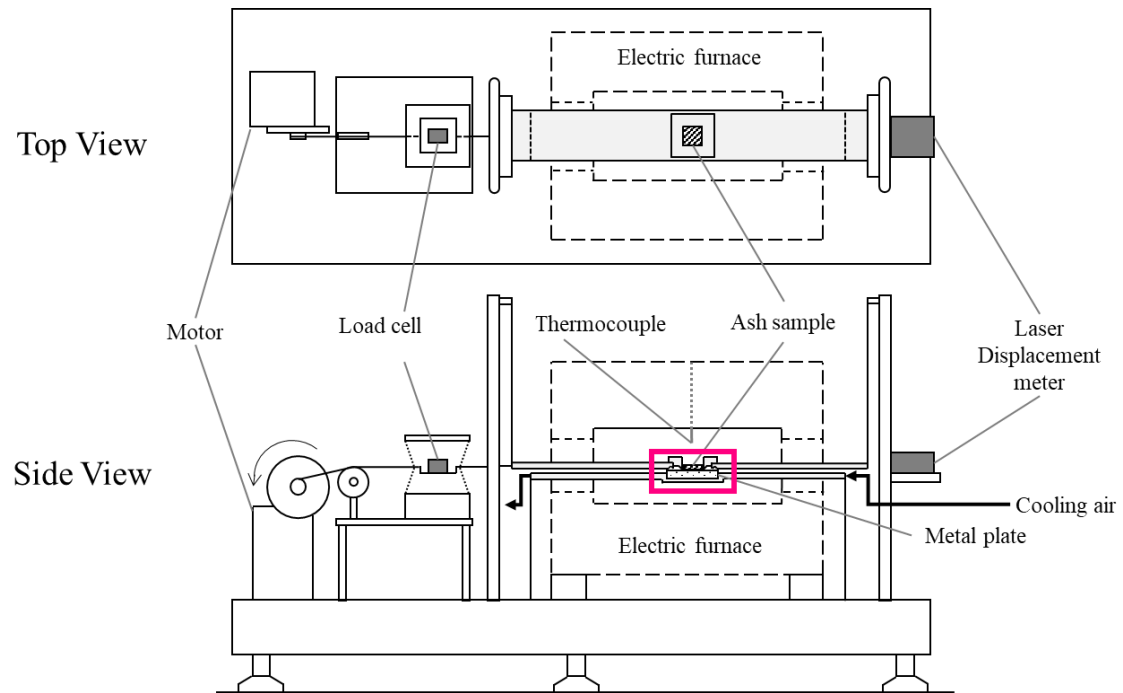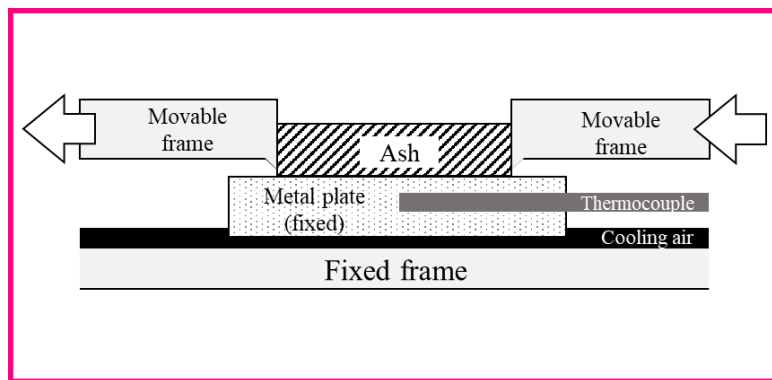

**Figure S2.** Schematic illustration of the shear strength testing system.

Overview  
(Side View)

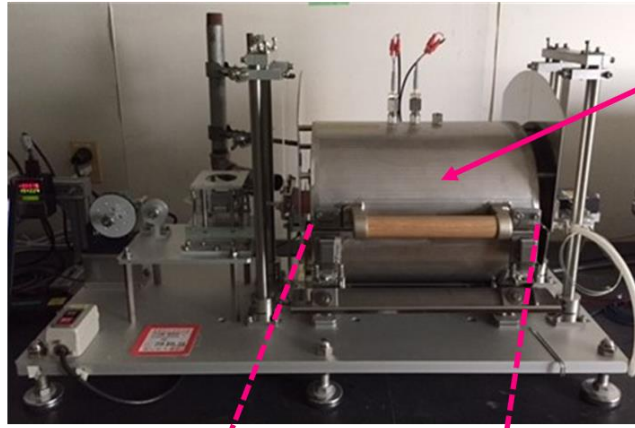

Electric Furnace (Closed)

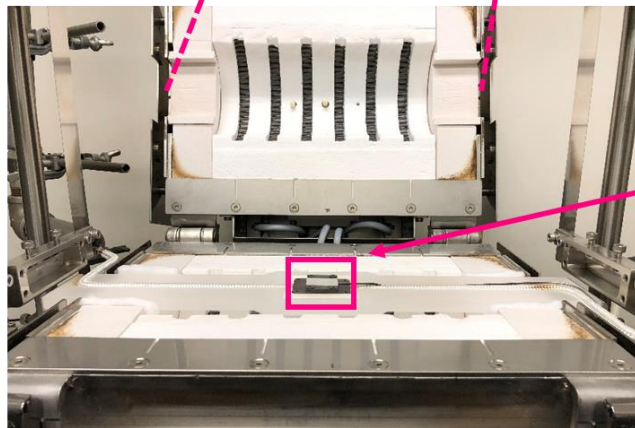

Electric Furnace (Open)

Cell

**Figure S3.** Photographs of the overview of shear strength testing system.

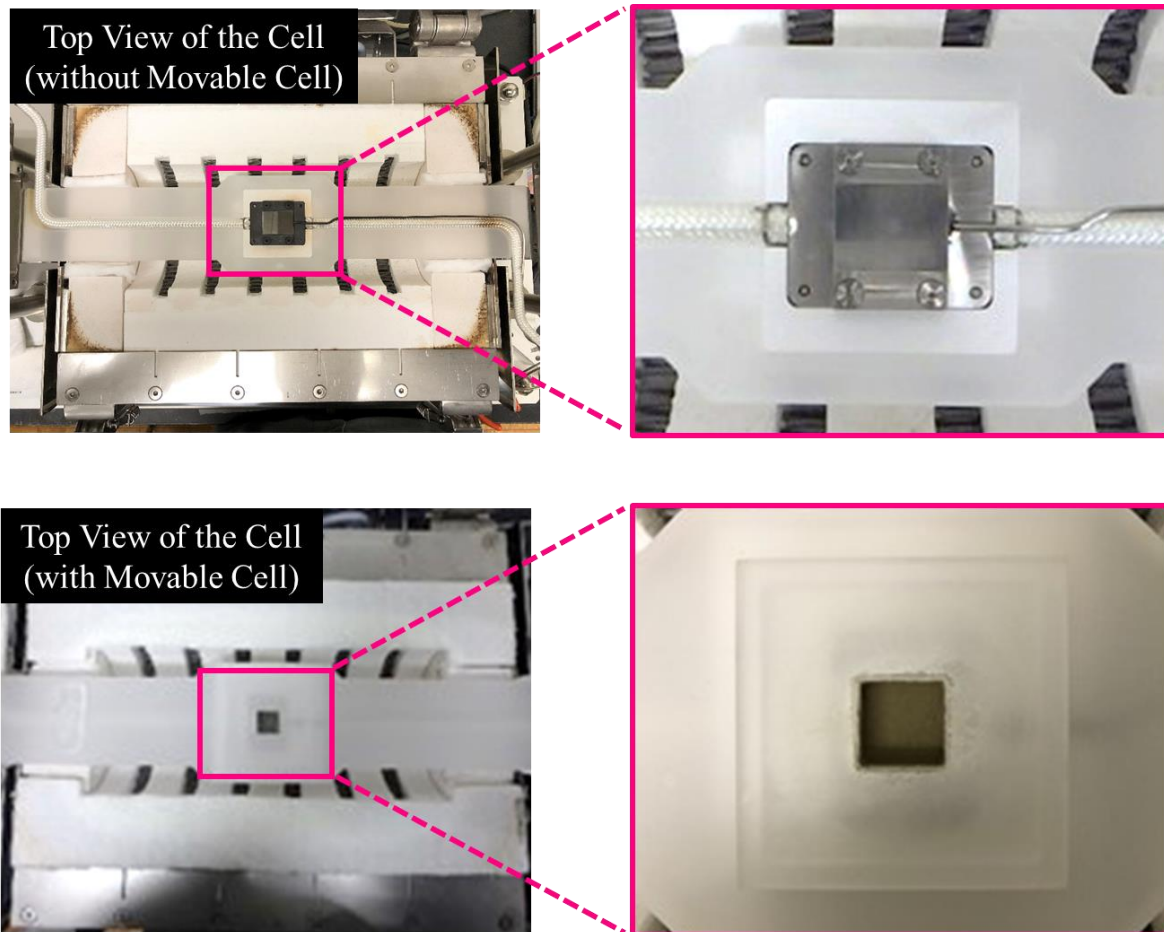

**Figure S4.** Photographs of the cell of the shear strength testing system.

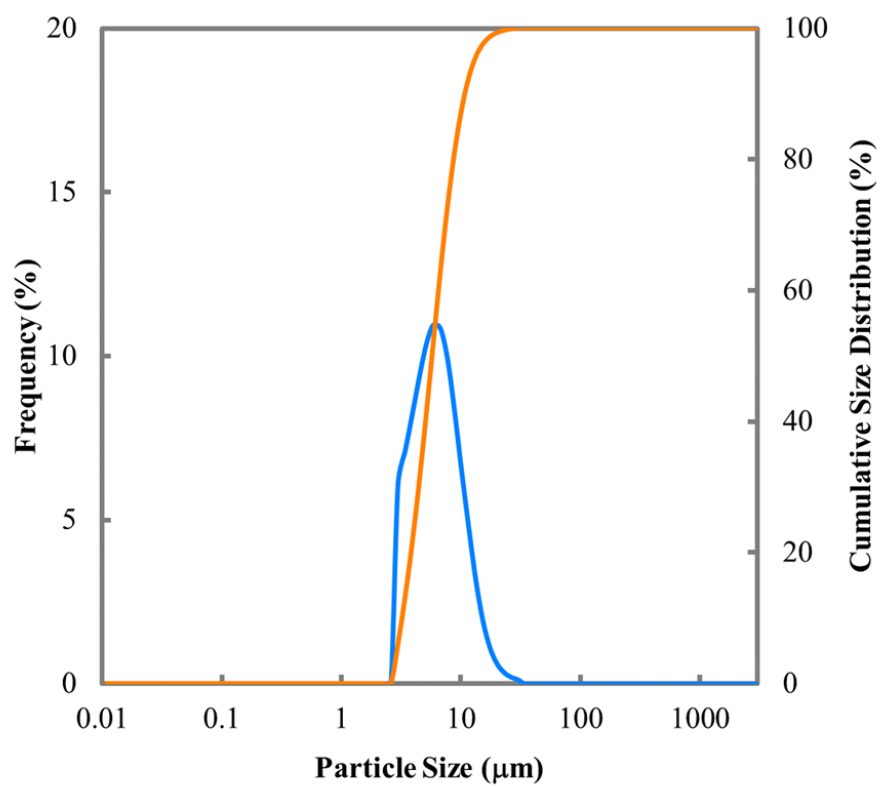

**Figure S5.** Size distribution of the fly ash sample.

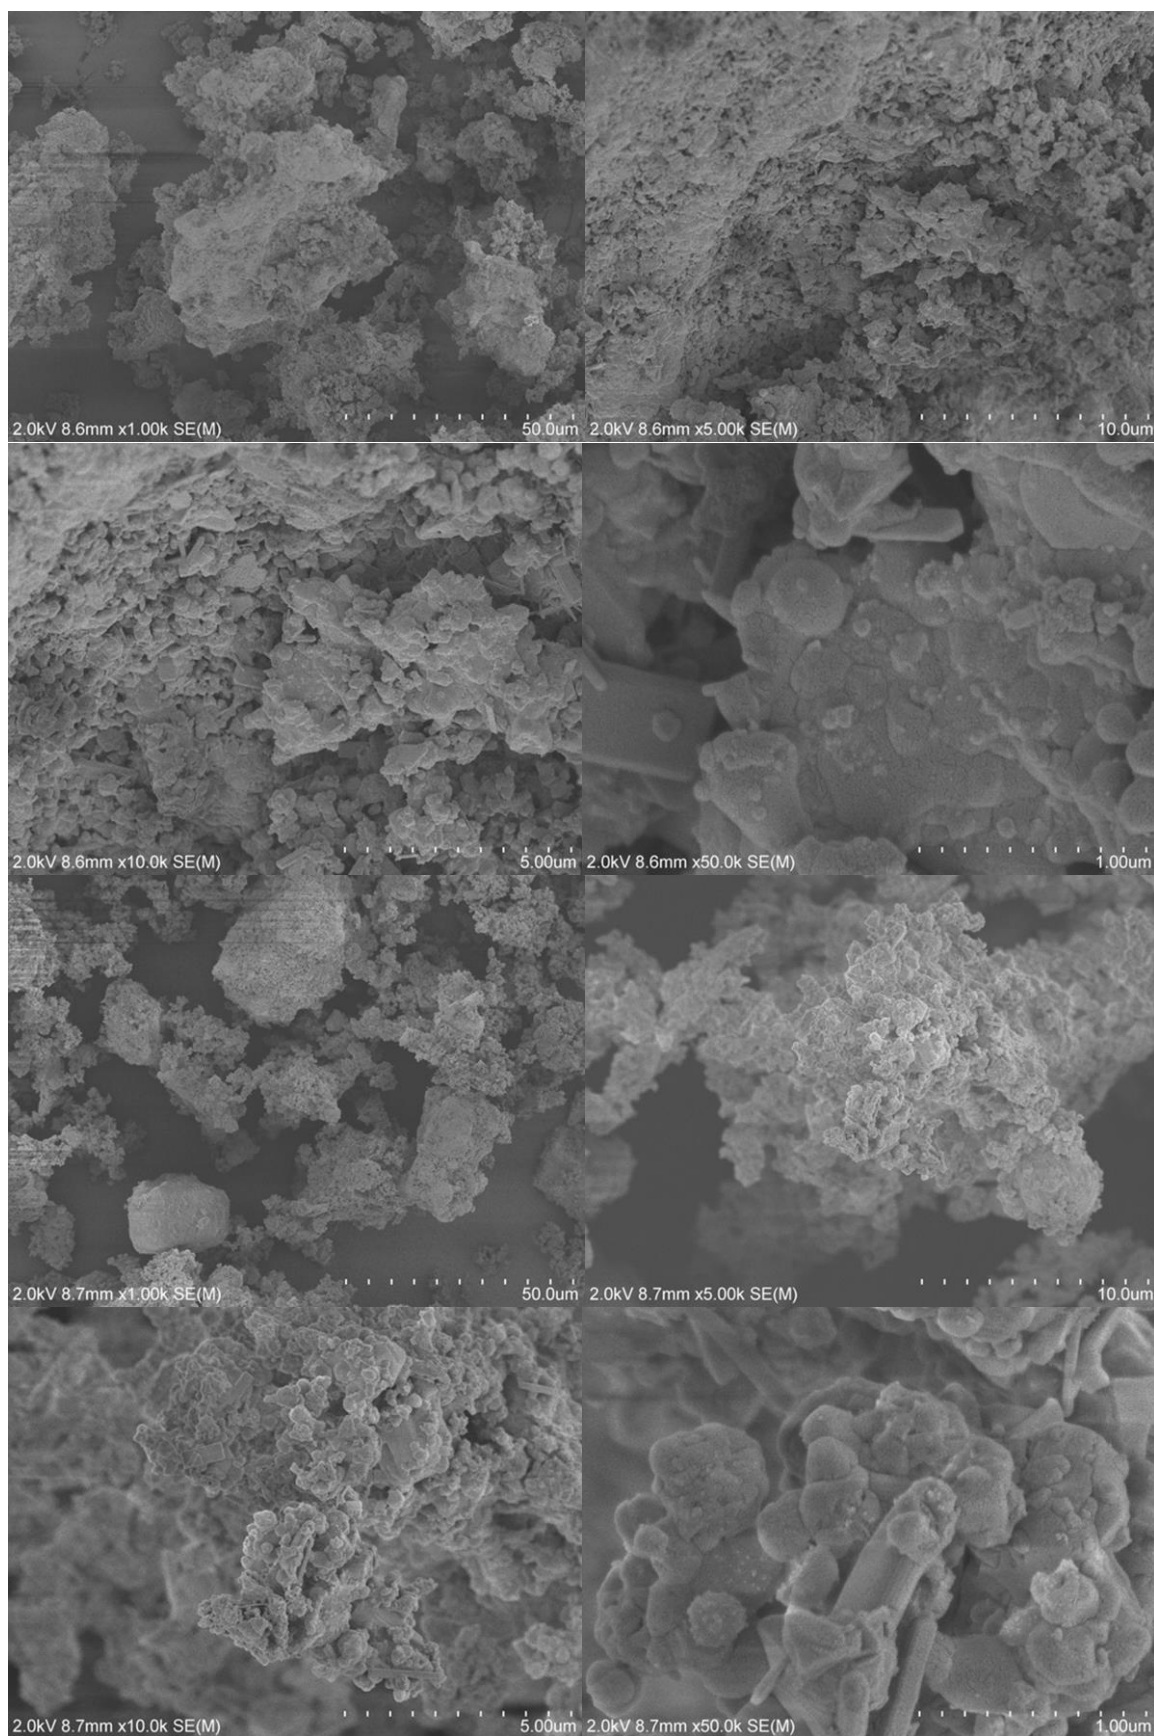

**Figure S6.** FE-SEM images of the of the fly ash sample.

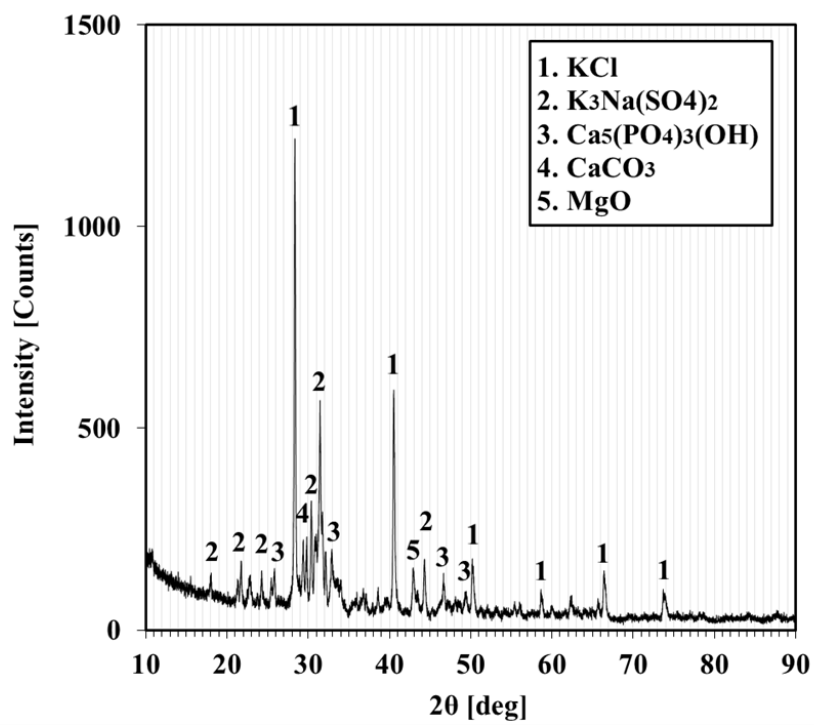

**Figure S7.** XRD pattern of the fly ash sample measured at room temperature.



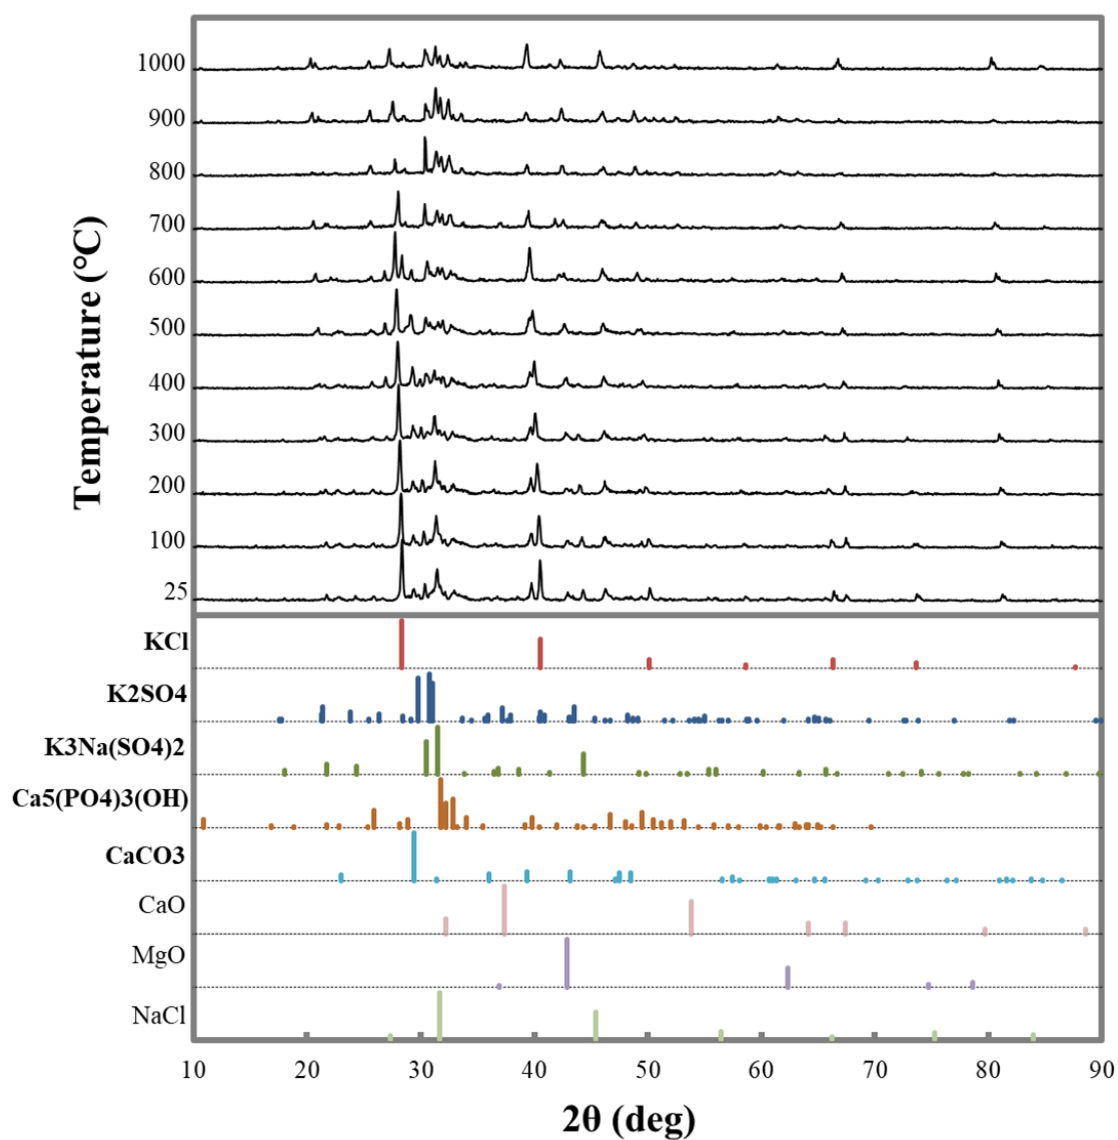

**Figure S8.** XRD patterns of the fly ash sample measured at varied temperatures.

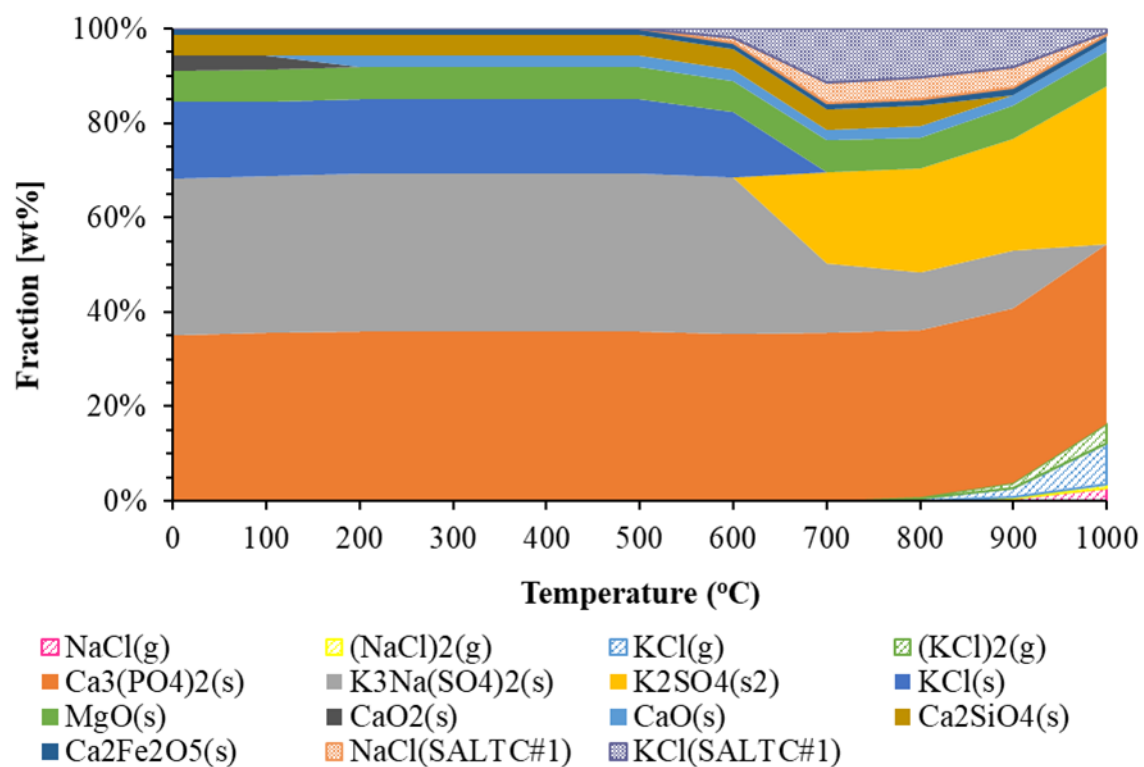

**Figure S9.** Chemical components found in thermodynamic equilibrium calculations.

## 2. Experimental Details.

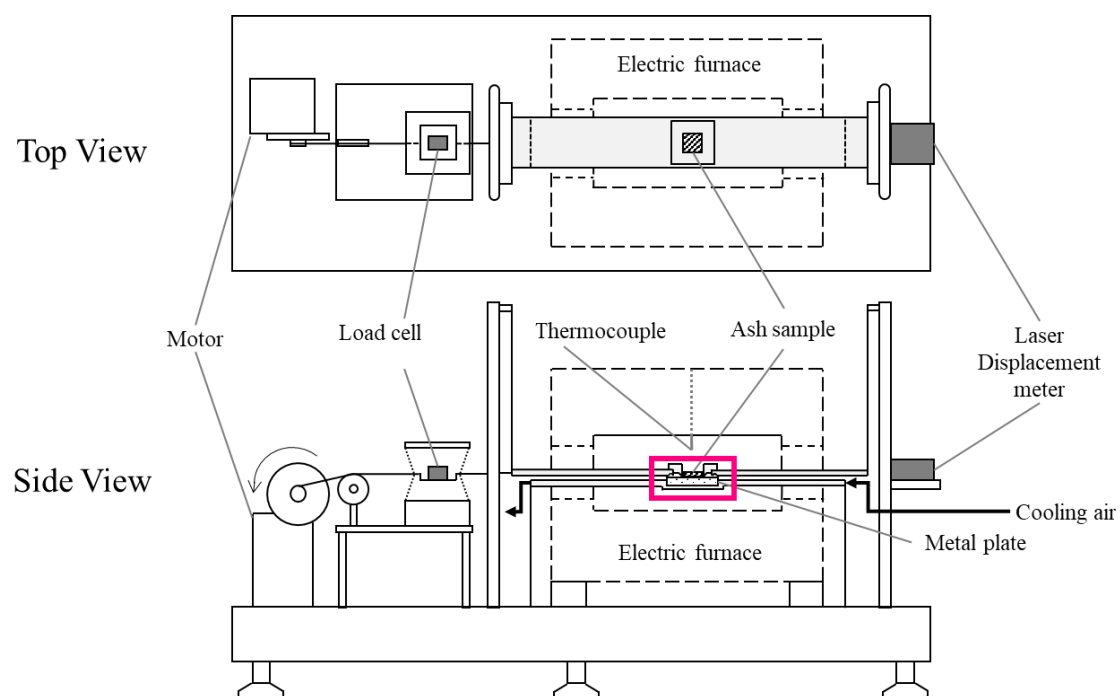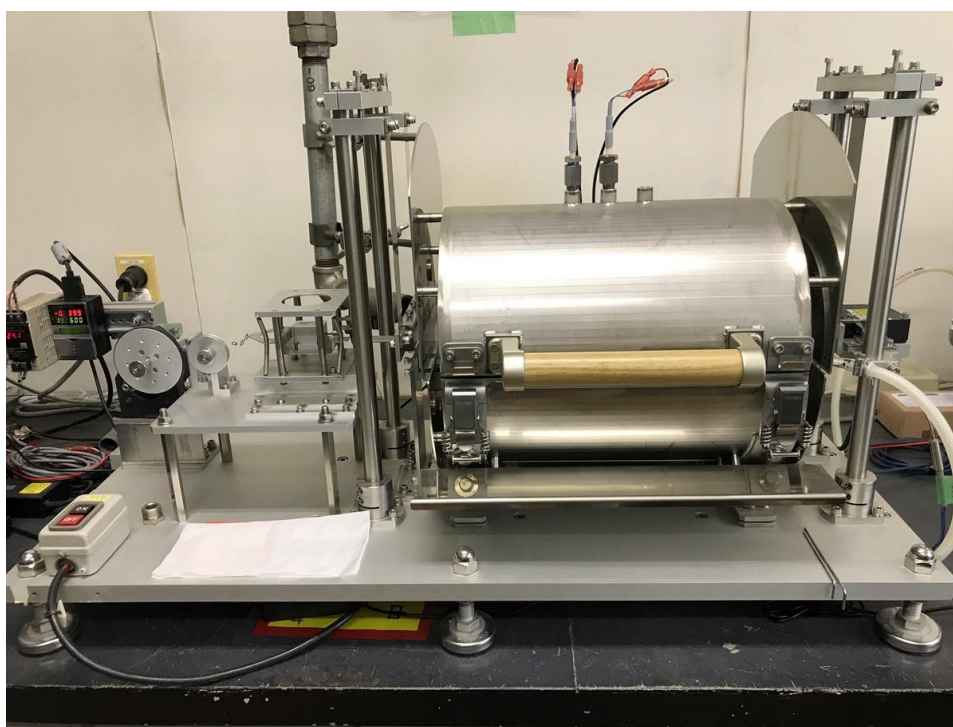

**Figure S10.** Overview of the shear strength testing system.

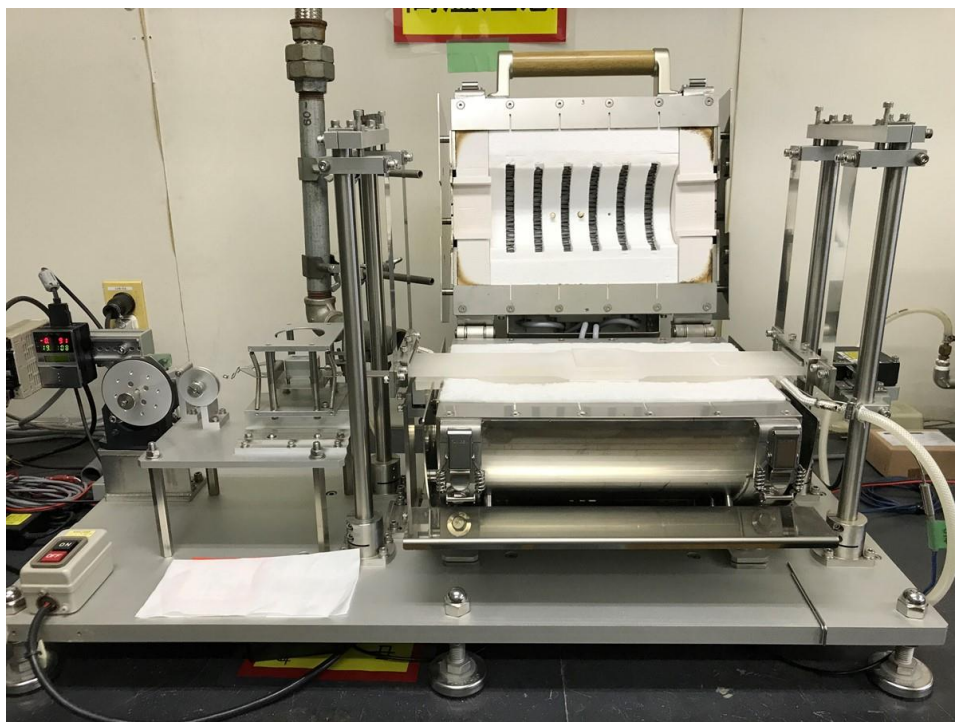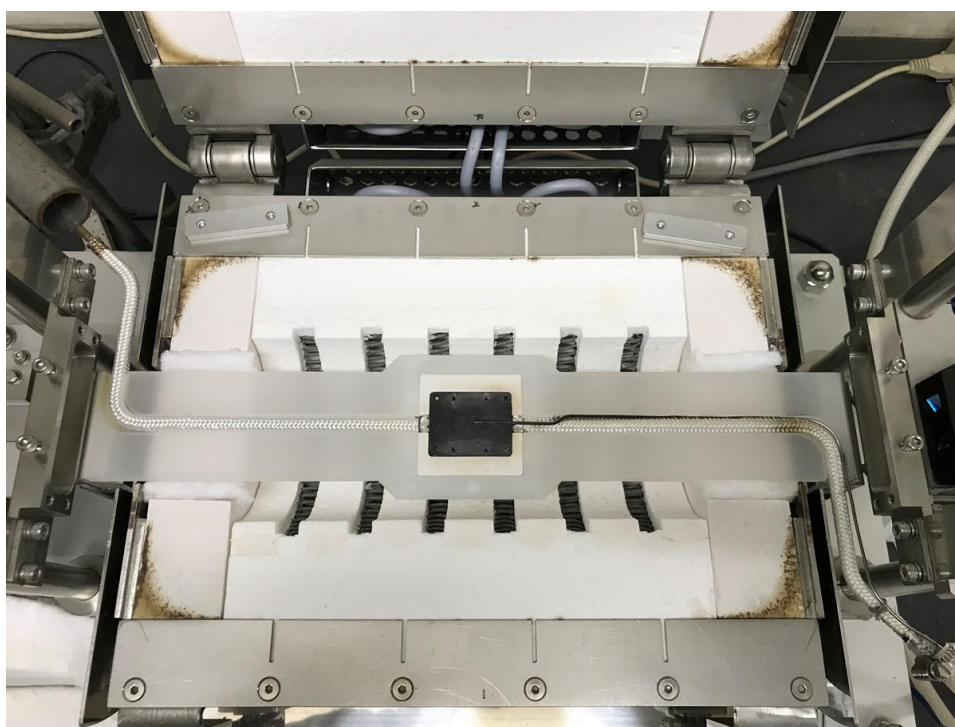

**Figure S11.** Open the electric furnace. Side view (above) and top view (below, inside of the electric furnace).

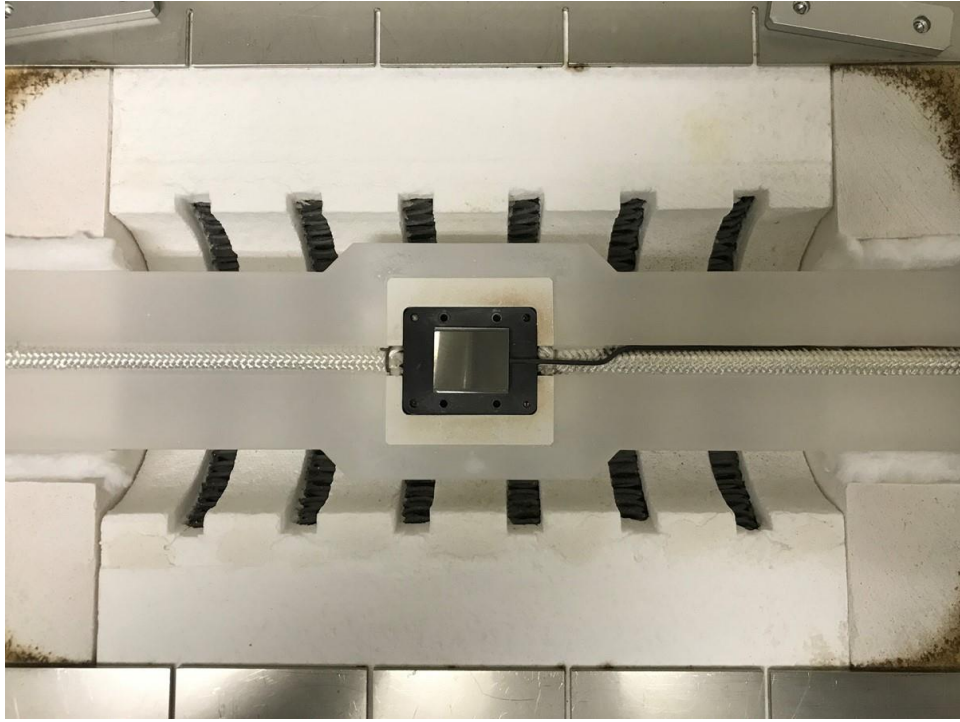

**Figure S12.** Set a metal plate.

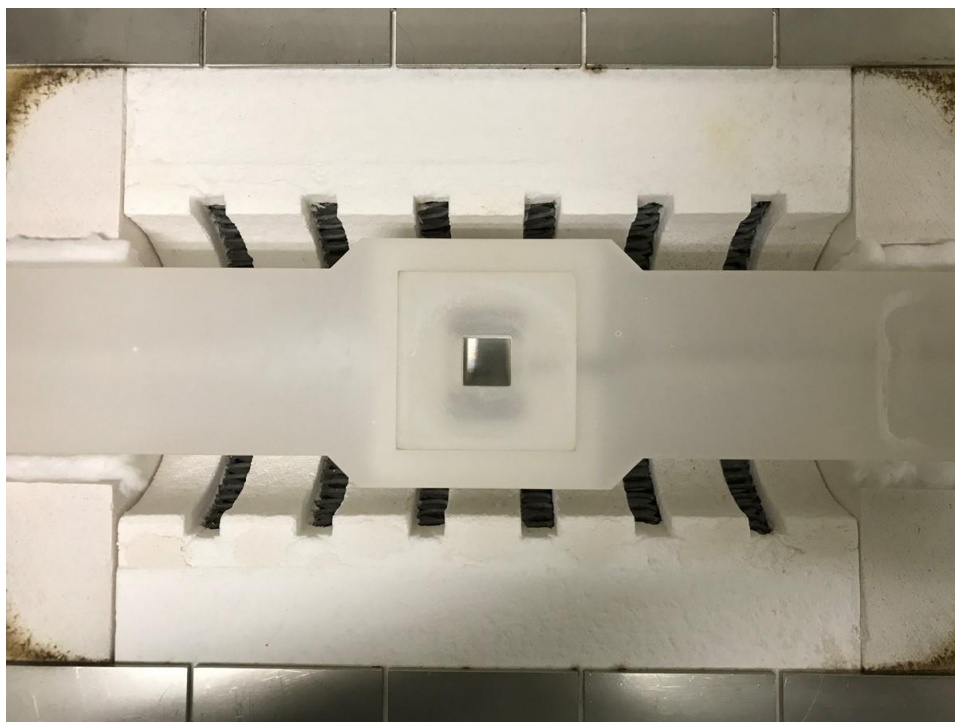

**Figure S13.** Set an integrated square cell (width/depth 15.8 mm  $\times$  height 16.0 mm).



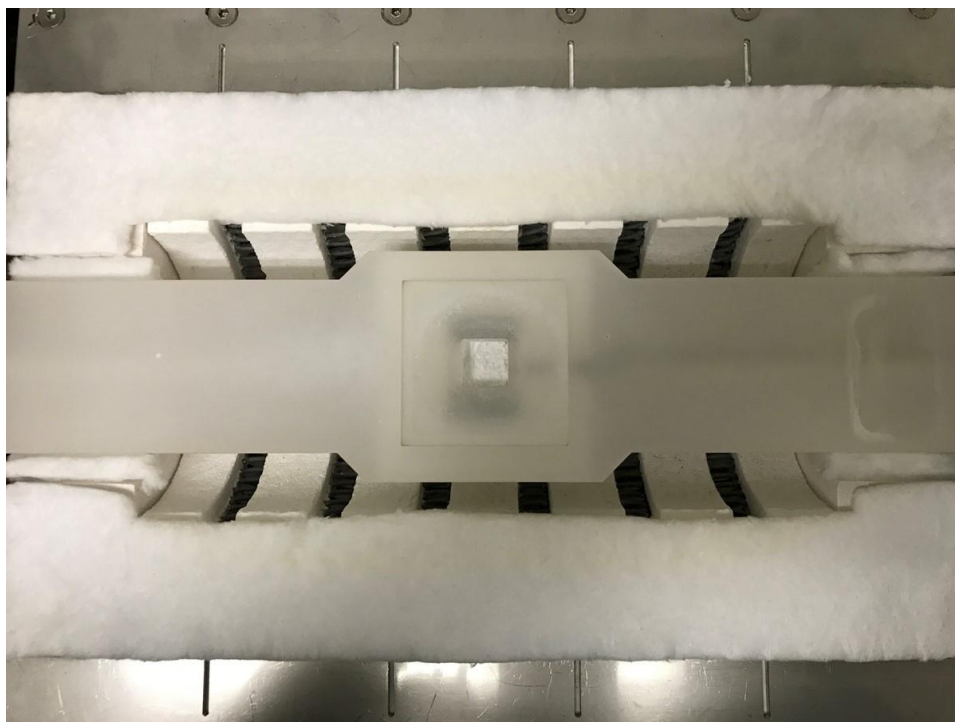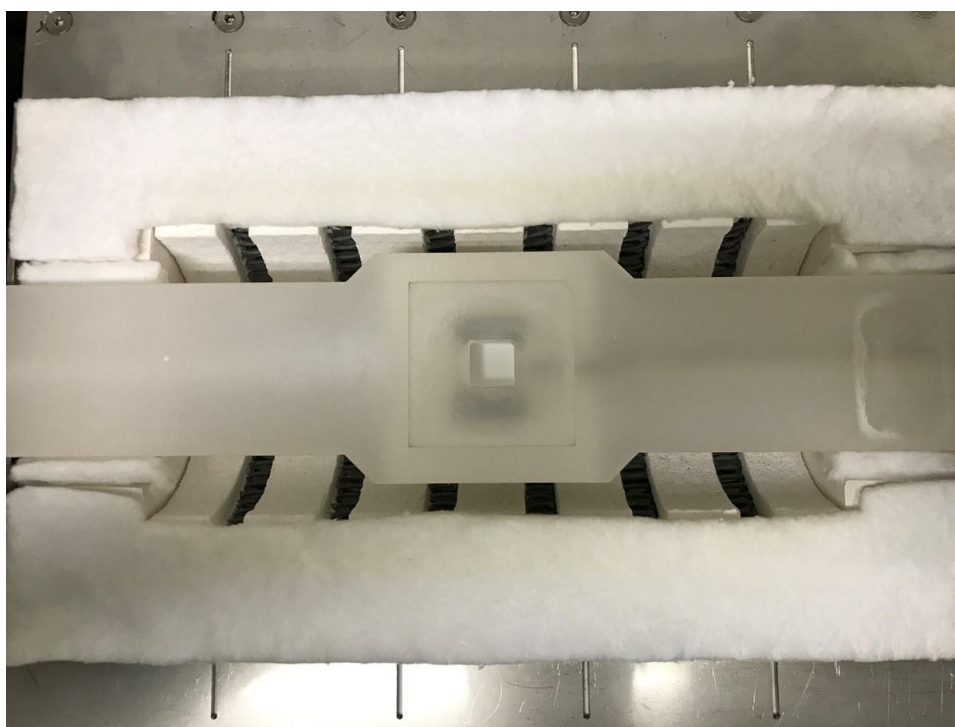

**Figure S14.** Pack fly ash samples (0.82 g) into the square cell and consolidate a powder bed by uniaxial pressing at 2.1 kPa for 10 min. Before consolidation (above) and after consolidation (below).

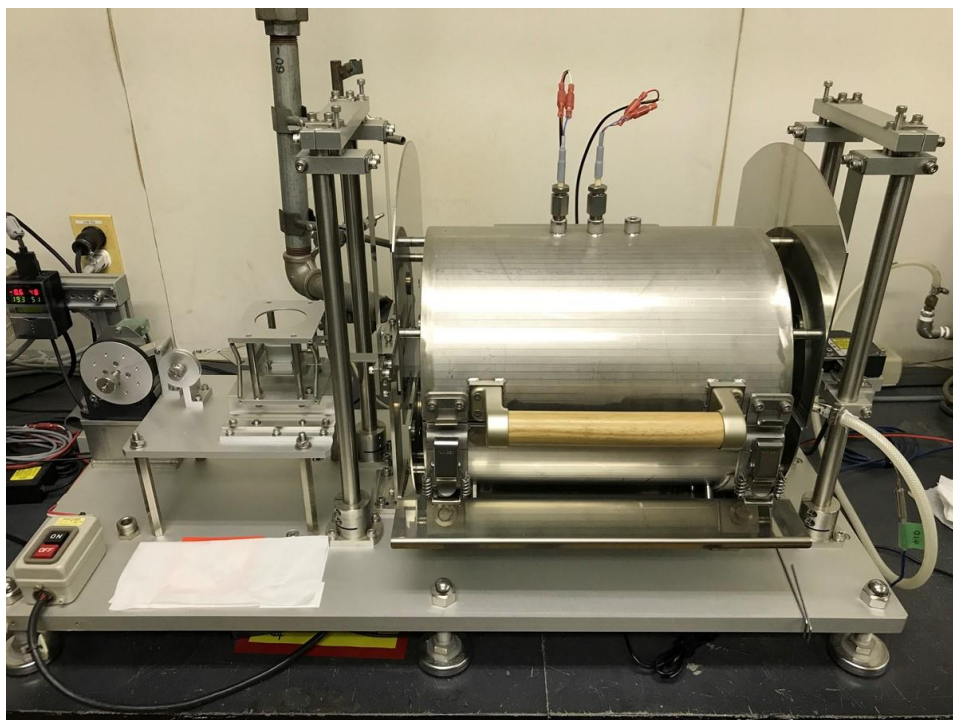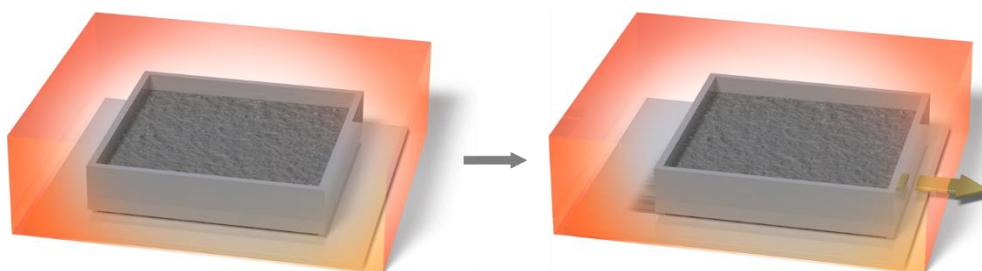

**Figure S15.** Close the electric furnace and start to heat ( $10\text{ }^{\circ}\text{C/min}$ ). When reached to a target temperature, the cell drags the powder bed on top of a metal plate in the furnace to measure shear strengths as a force of friction.
